# Supplementary material for: Activatable near-infrared fluorescence probe for real-time imaging of PD-L1 expression in tumors
Source: Royal Society of Chemistry journal article supplement (doi:10.1039/d4tb01148a), 2024-01-01
Supplement: d4tb01148a7.pdf [file d4tb01148a7.pdf]

## Supplementary Information

### **Activatable near-infrared fluorescence probe for real-time imaging of PD-L1 expression in tumors**

Hyunjin Kim,<sup>a†</sup> Maixian Liu,<sup>a†</sup> Chan Hyeok Park,<sup>b,c</sup> Byung Il Lee,<sup>b,c</sup> Hyonchol Jang,<sup>b,c</sup> and  
Yongdoo Choi<sup>\*a</sup>

<sup>a</sup> Division of Technology Convergence, National Cancer Center, 323 Ilsan-ro, Goyang, Gyeonggi-Do, 10408, Republic of Korea.

<sup>b</sup> Division of Rare and Refractory Cancer, National Cancer Center, 323 Ilsan-ro, Goyang, Gyeonggi-Do, 10408, Republic of Korea.

<sup>c</sup> Department of Cancer Biomedical Science, National Cancer Center Graduate School of Cancer Science and Policy, 323 Ilsan-ro, Goyang, Gyeonggi-Do, 10408, Republic of Korea.

<sup>†</sup>Hyunjin Kim and Maixian Liu contribute equally to this work

\*Corresponding author. E-mail:[ydchoi@ncc.re.kr](mailto:ydchoi@ncc.re.kr)

## **Analysis of the dye conjugation site**

### *Peptide digestion*

Atezolizumab and Q-Atezol were precipitated using acetone and solubilized in SDS solubilization buffer (5% SDS, 50mM TEAB pH 8.5). Proteins were digested using S-Trap™ spin columns (Protifi, Huntington, NY) with manufacturer's instructions. The samples were reduced by 1,4-dithiothreitol (DTT) and alkylated by iodoacetamide (IAA). After quenching the alkylation reaction, additional SDS and phosphoric acid were added so that the final concentration was 5% SDS and 1.2% phosphoric acid. Acidified samples were mixed with 90% methanol in 100mM TEAB, loaded into the S-Trap micro columns, incubated with mass spec grade trypsin/LysC (Promega) for 3 h at 47°C. Eluted peptides were evaporated using vacuum concentrator and cleaned up using C18 spin columns (Thermo Fisher Scientific, Rockford, IL).

### *Liquid chromatography-tandem mass spectrometry (LC-MS/MS) analysis*

Peptides were resuspended with 0.1% formic acid in water, separated using an Ultimate 3000 RSLCnano system (Thermo Scientific) and analyzed by an Orbitrap Eclipse Tribrid mass spectrometer (Thermo Scientific). Solvents A and B were 0.1% FA in water and 0.1% FA in acetonitrile, respectively. The peptides were loaded onto trap column (Acclaim PepMap™ 100, 75mm x 2cm), separated by the analytical column (Aurora Ultimate TS 25x75 C18 UHPLC column, IonOpticks) with a linear gradient from 3 to 35% solvent B for 90min at a flow rate 0.3 mL/min. The Orbitrap Eclipse Tribrid mass analyzer was operated in a data-dependent method for 3s cycle time. Full MS scans were acquired over the range m/z 375-1500 with mass resolution of 120,000 (at m/z 200). The AGC target value was standard. The most intense peaks with charge state  $\geq 2$  was fragmented in the higher-energy collisional dissociation (HCD) collision cell with normalized collision energy of 30 and tandem mass spectra were acquired in the Orbitrap mass analyzer with a mass resolution of 30,000 at m/z 200.

### *Protein identification and modification*

Database searching of all raw data files was performed in Proteome Discoverer 3.1 software (Thermo Fisher Scientific). SEQUEST-HT were used for database searching against

Atezolizumab fasta sequence. Database searching against the corresponding reversed database was also performed to evaluate the false discovery rate (FDR) of peptide identification. The database searching parameters included precursor ion mass tolerance 10 ppm, fragment ion mass tolerance 0.02 Da, static modifications for carbamidomethyl cysteine (+57.021 Da / C) and variable modifications for methionine oxidation (+15.995 Da / M), ATTO655 tags (+510.20 Da / K) and Alexa647 tags (+827.16 Da / K). We obtained FDR of less than 1% on the peptide level and filtered with the high peptide confidence.

**Table S1.** Analysis of the fluorescence dye-conjugated site in Q-Atezol. The most overlapping fragments were obtained from Q-Atezol digested by trypsin/LysC and analyzed by Q Exactive hybrid quadrupole-orbitrap mass spectrometry. A total of 4.3% and 51.6% of matched sequences were identified in a modified K289 (heavy chain) and K636 (light chain), respectively. Matched mass of b ion and y ion were indicated with red and blue color, respectively.

| #1 | b <sup>+</sup> | b <sup>2+</sup> | Seq.         | y <sup>+</sup> | y <sup>2+</sup> | #2 |
|----|----------------|-----------------|--------------|----------------|-----------------|----|
| 1  | 148.07569      | 74.54148        | F            |                |                 | 18 |
| 2  | 262.11862      | 131.56295       | N            | 2522.22853     | 1261.61790      | 17 |
| 3  | 448.19793      | 224.60260       | W            | 2408.18560     | 1204.59644      | 16 |
| 4  | 611.26126      | 306.13427       | Y            | 2222.10628     | 1111.55678      | 15 |
| 5  | 710.32967      | 355.66847       | V            | 2059.04296     | 1030.02512      | 14 |
| 6  | 825.35662      | 413.18195       | D            | 1959.97454     | 980.49091       | 13 |
| 7  | 882.37808      | 441.69268       | G            | 1844.94760     | 922.97744       | 12 |
| 8  | 981.44649      | 491.22689       | V            | 1787.92614     | 894.46671       | 11 |
| 9  | 1110.48909     | 555.74818       | E            | 1688.85772     | 844.93250       | 10 |
| 10 | 1209.55750     | 605.28239       | V            | 1559.81513     | 780.41120       | 9  |
| 11 | 1346.61641     | 673.81184       | H            | 1460.74672     | 730.87700       | 8  |
| 12 | 1460.65934     | 730.83331       | N            | 1323.68780     | 662.34754       | 7  |
| 13 | 1531.69645     | 766.35187       | A            | 1209.64488     | 605.32608       | 6  |
| 14 | 2168.98986     | 1084.99857      | K289-ATTO655 | 1138.60776     | 569.80752       | 5  |
| 15 | 2270.03754     | 1135.52241      | T            | 501.31436      | 251.16082       | 4  |
| 16 | 2398.13250     | 1199.56989      | K            | 400.26668      | 200.63698       | 3  |
| 17 | 2495.18526     | 1248.09627      | P            | 272.17172      | 136.58950       | 2  |
| 18 |                |                 | R            | 175.11895      | 88.06311        | 1  |

  

| #1 | b <sup>+</sup> | b <sup>2+</sup> | Seq. | y <sup>+</sup> | y <sup>2+</sup> | #2 |
|----|----------------|-----------------|------|----------------|-----------------|----|
| 1  | 72.04439       | 36.52583        | A    |                |                 | 7  |
| 2  | 187.07133      | 94.03930        | D    | 1328.59799     | 664.80263       | 6  |

|   |            |           |              |            |           |   |
|---|------------|-----------|--------------|------------|-----------|---|
| 3 | 350.13466  | 175.57097 | Y            | 1213.57104 | 607.28916 | 5 |
| 4 | 479.17725  | 240.09227 | E            | 1050.50771 | 525.75750 | 4 |
| 5 | 1116.47066 | 558.73897 | K636-ATTO655 | 921.46512  | 461.23620 | 3 |
| 6 | 1253.52957 | 627.26842 | H            | 284.17172  | 142.58950 | 2 |
| 7 |            |           | K            | 147.11280  | 74.06004  | 1 |

**Table S2.** Analysis of the same part as Q-Atezol in Atezolizumab. Atezolizumab was digested with trypsin/LysC and analyzed by Q Exactive hybrid quadrupole-orbitrap mass spectrometry. Mass modified with ATTO655 was not indicated for both K289 and K636 from Atezolizumab.

| #1 | b <sup>+</sup> | b <sup>2+</sup> | Seq. | y <sup>+</sup> | y <sup>2+</sup> | #2 |
|----|----------------|-----------------|------|----------------|-----------------|----|
| 1  | 148.07569      | 74.54148        | F    |                |                 | 18 |
| 2  | 262.11862      | 131.56295       | N    | 2013.03008     | 1007.01868      | 17 |
| 3  | 448.19793      | 224.60260       | W    | 1898.98716     | 949.99722       | 16 |
| 4  | 611.26126      | 306.13427       | Y    | 1712.90784     | 856.95756       | 15 |
| 5  | 710.32967      | 355.66847       | V    | 1549.84451     | 775.42590       | 14 |
| 6  | 825.35662      | 413.18195       | D    | 1450.77610     | 725.89169       | 13 |
| 7  | 882.37808      | 441.69268       | G    | 1335.74916     | 668.37822       | 12 |
| 8  | 981.44649      | 491.22689       | V    | 1278.72769     | 639.86749       | 11 |
| 9  | 1110.48909     | 555.74818       | E    | 1179.65928     | 590.33328       | 10 |
| 10 | 1209.55750     | 605.28239       | V    | 1050.61669     | 525.81198       | 9  |
| 11 | 1346.61641     | 673.81184       | H    | 951.54827      | 476.27777       | 8  |
| 12 | 1460.65934     | 730.83331       | N    | 814.48936      | 407.74832       | 7  |
| 13 | 1531.69645     | 766.35187       | A    | 700.44643      | 350.72686       | 6  |
| 14 | 1659.79142     | 830.39935       | K289 | 629.40932      | 315.20830       | 5  |
| 15 | 1760.83909     | 880.92319       | T    | 501.31436      | 251.16082       | 4  |
| 16 | 1888.93406     | 944.97067       | K    | 400.26668      | 200.63698       | 3  |
| 17 | 1985.98682     | 993.49705       | P    | 272.17172      | 136.58950       | 2  |
| 18 |                |                 | R    | 175.11895      | 88.06311        | 1  |

| #1 | b <sup>+</sup> | b <sup>2+</sup> | Seq. | y <sup>+</sup> | y <sup>2+</sup> | #2 |
|----|----------------|-----------------|------|----------------|-----------------|----|
| 1  | 72.04439       | 36.52583        | A    |                |                 | 7  |
| 2  | 187.07133      | 94.03930        | D    | 819.39954      | 410.20341       | 6  |
| 3  | 350.13466      | 175.57097       | Y    | 704.37260      | 352.68994       | 5  |
| 4  | 479.17725      | 240.09227       | E    | 541.30927      | 271.15827       | 4  |
| 5  | 607.27222      | 304.13975       | K636 | 412.26668      | 206.63698       | 3  |
| 6  | 744.33113      | 372.66920       | H    | 284.17172      | 142.58950       | 2  |
| 7  |                |                 | K    | 147.11280      | 74.06004        | 1  |



## Figures

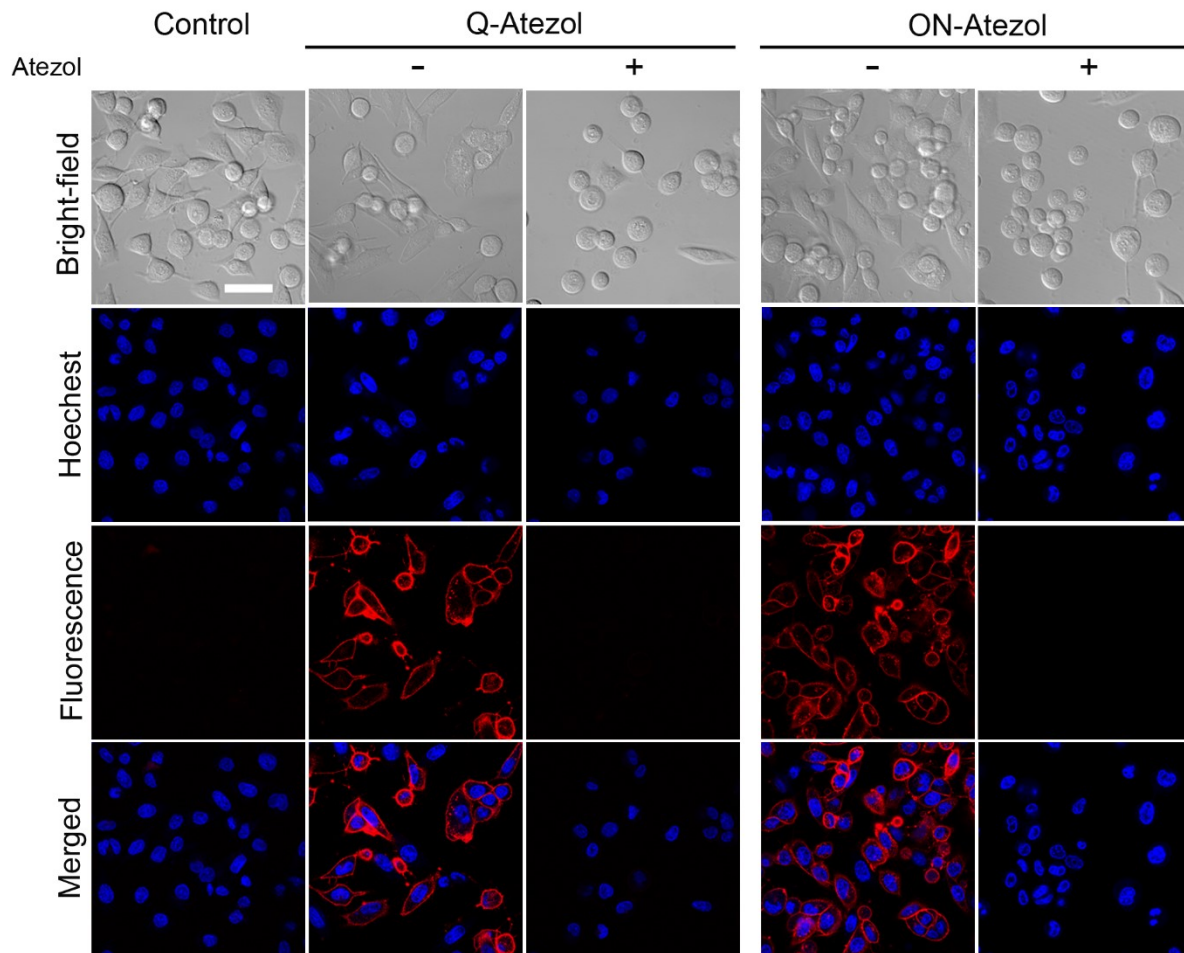

**Fig. S1.** Confocal images ( $\lambda_{\text{ex.}}$  633 nm,  $\lambda_{\text{em.}}$  638–759 nm) of H1975 cells treated with Q- and ON-Atezols (1  $\mu\text{M}$  dye equivalent). For the competitive PD-L1 binding assay, H1975 cells were pre-treated with an excess of unlabelled Atezolizumab (250  $\mu\text{g}$ ) for 30 min, and then treated with Q-Atezol and ON-Atezol for 30 min. After washing the cells three times, confocal images of the cells were obtained. Untreated cells were used as controls. Scale bar = 50  $\mu\text{m}$ .

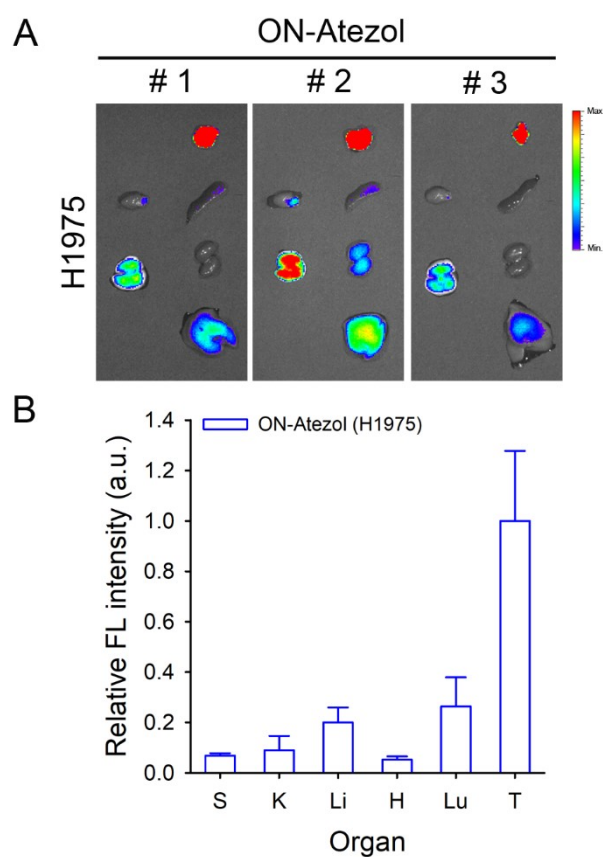

**Fig. S2.** (A) Representative *ex vivo* NIR fluorescence images of tumors and major organs from ON-Atezol-treated H1975 tumor-bearing mice. ON-Atezol was intravenously injected and *ex vivo* NIR fluorescence images of tumors and organs ( $\lambda_{\text{ex}}$ . 660/20 nm,  $\lambda_{\text{em}}$ . 710/40 nm) were obtained 24 h post-injection. (B) Comparison of relative fluorescence (FL) intensities in tumors and organs.

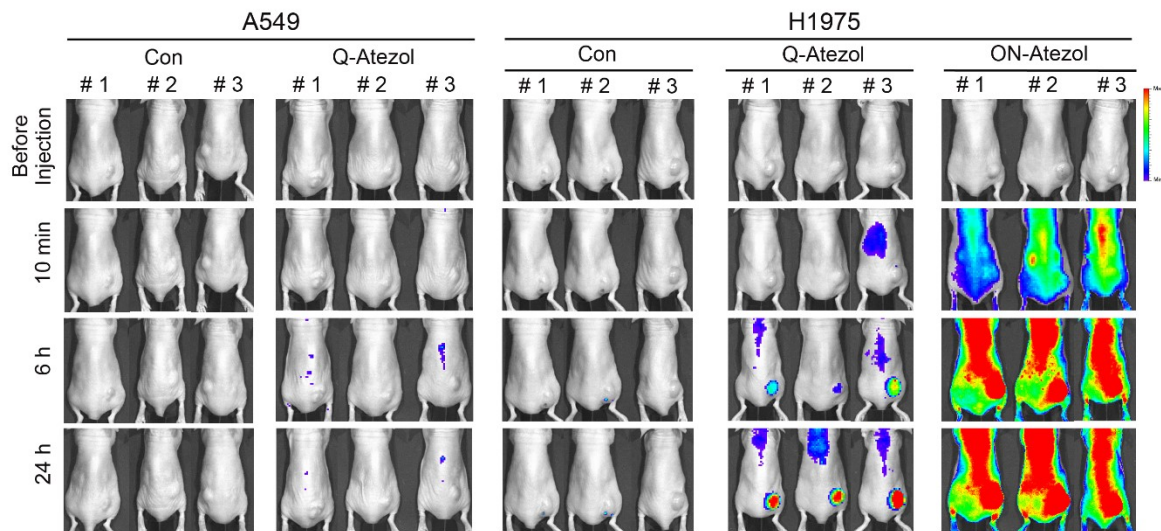

**Fig. S3.** NIR fluorescence images of A549 and H1975 tumor-bearing mice. Q- and ON-Atezol were intravenously injected into mice, and NIR fluorescence images ( $\lambda_{\text{ex}}$ . 660/20 nm,  $\lambda_{\text{em}}$ . 710/40 nm) were obtained at various time points.

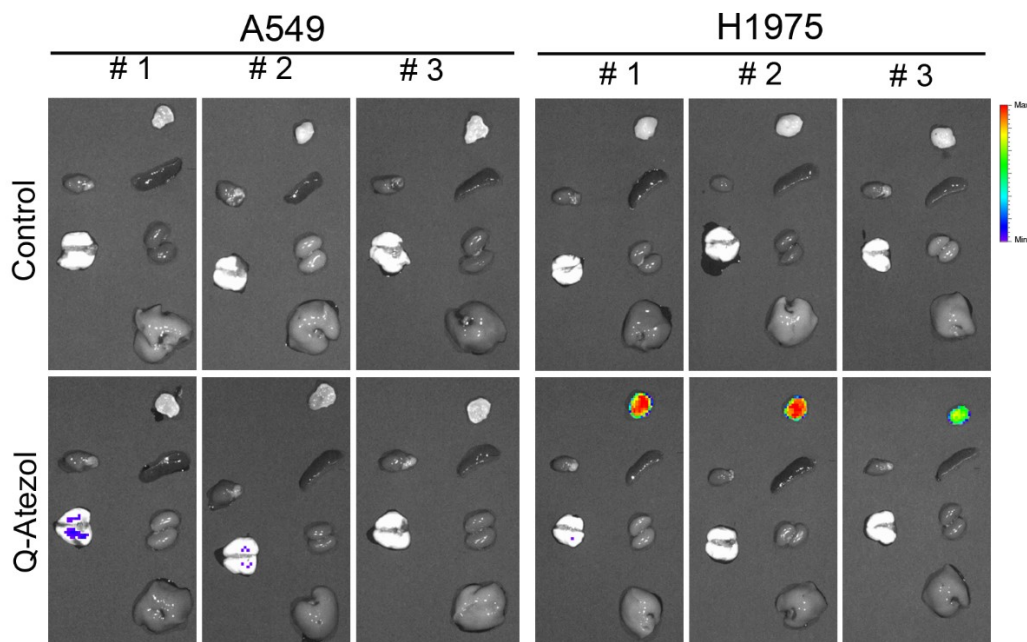

**Fig. S4.** Ex vivo NIR fluorescence images of tumors and major organs ( $\lambda_{\text{ex}}$ . 660/20 nm,  $\lambda_{\text{em}}$ . 710/40 nm) 24 h post-injection. (H, heart; Lu, lung; T, tumor; S, spleen; K, kidney; Li, liver).



## **Movies**

Movie S1. Confocal fluorescence images of H1975 tumor spheroids without probe treatment.

Movie S2. Confocal fluorescence images of A549 tumor spheroids without probe treatment.

Movie S3. Confocal fluorescence images of H1975 tumor spheroids treated with ON-Atezol (red).

Movie S4. Confocal fluorescence images of A549 tumor spheroids treated with ON-Atezol (red).

Movie S5. Confocal fluorescence images of H1975 tumor spheroids treated with Q-Atezol (red).

Movie S6. Confocal fluorescence images of A549 tumor spheroids treated with Q-Atezol (red).
